# Supplementary material
Source: bioRxiv or medRxiv preprint supplement (https://medrxiv.org/content/medrxiv/early/2023/11/09/2023.11.08.23297434/DC1/embed/media-1.pdf)
Supplement: Supplementary file [file media-1.pdf]

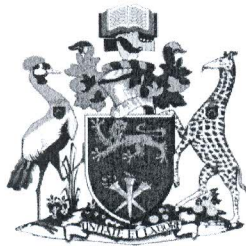

UNIVERSITY OF NAIROBI  
COLLEGE OF HEALTH SCIENCES  
P O BOX 19676 Code 00202  
Telegrams: varsity  
Tel:(254-020) 2726300 Ext 44355

**KNH-UON ERC**  
Email: [uonknh\\_erc@uonbi.ac.ke](mailto:uonknh_erc@uonbi.ac.ke)  
Website: <http://www.erc.uonbi.ac.ke>  
Facebook: <https://www.facebook.com/uonknh.erc>  
Twitter: @UONKNH\_ERC [https://twitter.com/UONKNH\\_ERC](https://twitter.com/UONKNH_ERC)

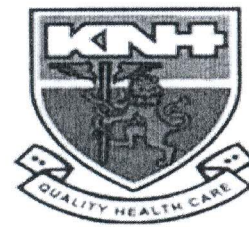

KENYATTA NATIONAL HOSPITAL  
P O BOX 20723 Code 00202  
Tel: 726300-9  
Fax: 725272  
Telegrams: MEDSUP, Nairobi

Ref: KNH-ERC/A/146

14<sup>th</sup> May 2020

Dr. Ephranzia Chao Malindi  
Reg. No.H58/8190/2017  
Dept. of Diagnostic Imaging and Rad. Medicine  
School of Medicine  
College of Health Sciences  
University of Nairobi

Dear Dr. Malindi

**RESEARCH PROPOSAL – ULTRASOUND IMAGING DETECTION OF HEPATOCELLULAR SUSPICIOUS LESION AMONG HIGH RISK PATIENTS ATTENDING KENYATTA NATIONAL REFERRAL HOSPITAL LIVER CLINIC (P1029/12/2019)**

This is to inform you that the KNH- UoN Ethics & Research Committee (KNH- UoN ERC) has reviewed and **approved** your above research proposal. The approval period is 14<sup>th</sup> May 2020 – 13<sup>th</sup> May 2021.

This approval is subject to compliance with the following requirements:

- a. Only approved documents (informed consents, study instruments, advertising materials etc) will be used.
- b. All changes (amendments, deviations, violations etc.) are submitted for review and approval by KNH-UoN ERC before implementation.
- c. Death and life threatening problems and serious adverse events (SAEs) or unexpected adverse events whether related or unrelated to the study must be reported to the KNH-UoN ERC within 72 hours of notification.
- d. Any changes, anticipated or otherwise that may increase the risks or affect safety or welfare of study participants and others or affect the integrity of the research must be reported to KNH- UoN ERC within 72 hours.
- e. Clearance for export of biological specimens must be obtained from KNH- UoN ERC for each batch of shipment.
- f. Submission of a request for renewal of approval at least 60 days prior to expiry of the approval period. (*Attach a comprehensive progress report to support the renewal*).
- g. Submission of an *executive summary* report within 90 days upon completion of the study. This information will form part of the data base that will be consulted in future when processing related research studies so as to minimize chances of study duplication and/ or plagiarism.

For more details consult the KNH- UoN ERC website <http://www.erc.uonbi.ac.ke>

Yours sincerely,



**PROF. M. L. CHINDIA**  
**SECRETARY, KNH-UoN ERC**

- c.c.     The Principal, College of Health Sciences, UoN  
          The Director, CS, KNH  
          The Chairperson, KNH- UoN ERC  
          The Assistant Director, Health Information, KNH  
          The Dean, School of Medicine, UoN  
          The Chair, Dept. of Diagnostic Imaging and Radiation Medicine, UoN  
          Supervisors: Dr. Mutala Musila Timothy, Dept. of Diagnostic Imaging and Radiation Medicine, UoN  
                      Dr. Onyango Stephen Ayo, Dept. of Internal Medicine, KNH
